# Supplementary material
Source: PubMed Central journal article supplement (PMC6098742)

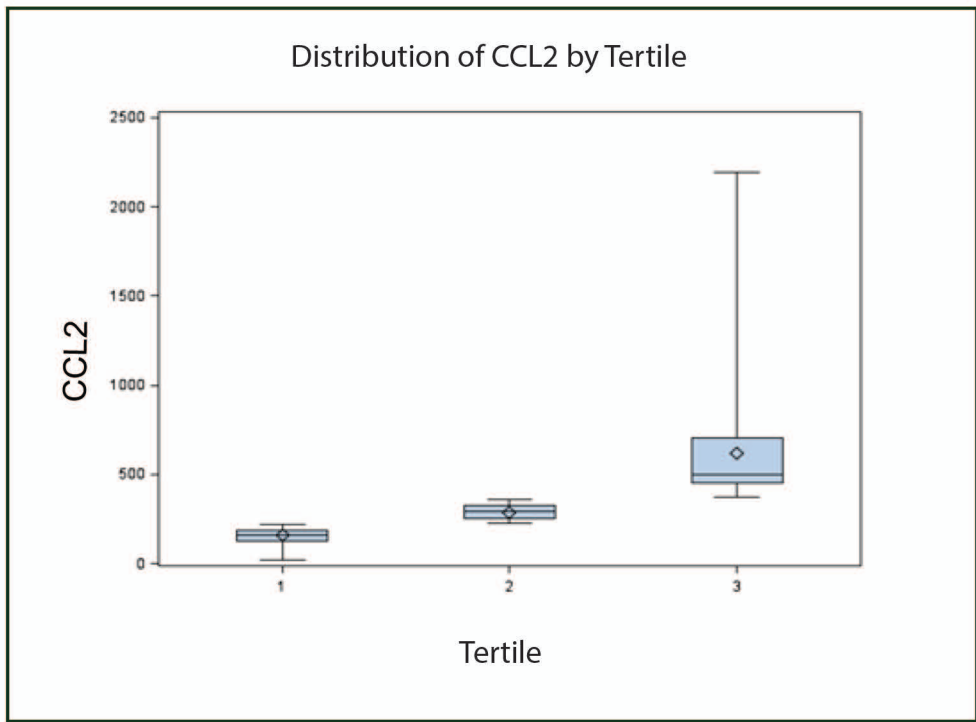

Supplement: NIHMS969074-supplement-2.pdf [file NIHMS969074-supplement-2.pdf]
